# Supplementary material for: Trends in and Characteristics of Buprenorphine Misuse Among Adults in the US
Source: PubMed Central journal article supplement (PMC8520126; doi:10.1001/jamanetworkopen.2021.29409), 2021-10-15
Supplement: jamanetwopen-e2129409-s001.pdf [file jamanetwopen-e2129409-s001.pdf]

## Supplementary Online Content

Han B, Jones CM, Einstein EB, Compton WM. Trends in and characteristics of buprenorphine misuse among adults in the US. *JAMA Netw Open*. 2021;4(10):e2129409. doi:10.1001/jamanetworkopen.2021.29409

**eTable.** Multivariable Multinomial Logistic Regression Factors Associated With Past-Year Opioid Use Disorder and Buprenorphine Misuse Status Among US Adults With Past-Year Buprenorphine Use

This supplementary material has been provided by the authors to give readers additional information about their work.

**eTable.** Multivariable Multinomial Logistic Regression Factors Associated With Past-Year Opioid Use Disorder and Buprenorphine Misuse Status Among US Adults With Past-Year Buprenorphine Use

|                                                | Adjusted OR (95% CI)                  |                                          |                                                          |                                             |                                                |                                                        |
|------------------------------------------------|---------------------------------------|------------------------------------------|----------------------------------------------------------|---------------------------------------------|------------------------------------------------|--------------------------------------------------------|
| Among Adults with Past- Year Buprenorphine Use | OU <b>D</b> :<br>Misuse vs. No misuse | No O <b>U</b> D:<br>Misuse vs. No misuse | Misuse & O <b>U</b> D vs.<br>No Misuse & No O <b>U</b> D | Misuse:<br>O <b>U</b> D vs. No O <b>U</b> D | No Misuse:<br>O <b>U</b> D vs. No O <b>U</b> D | Misuse, No O <b>U</b> D vs.<br>No Misuse, O <b>U</b> D |
| <b>Age</b>                                     |                                       |                                          |                                                          |                                             |                                                |                                                        |
| 18-23                                          | 2.0 (0.84-4.98)                       | 2.0 (0.87-4.78)                          | 1.7 (0.73-4.09)                                          | 0.8 (0.35-2.05)                             | 0.8 (0.34-2.12)                                | <b>2.4 (1.01-5.81)</b>                                 |
| 24-34                                          | <b>2.9 (1.42-5.77)</b>                | <b>2.1 (1.08-4.22)</b>                   | <b>2.8 (1.41-5.61)</b>                                   | 1.3 (0.62-2.77)                             | 1.0 (0.45-2.13)                                | <b>2.2 (1.08-4.40)</b>                                 |
| 35-49                                          | <b>2.3 (1.20-4.52)</b>                | 1.6 (0.88-2.82)                          | <b>2.4 (1.23-4.64)</b>                                   | 1.5 (0.69-3.32)                             | 1.0 (0.44-2.38)                                | 1.5 (0.64-3.68)                                        |
| ≥50+                                           | 1.0                                   | 1.0                                      | 1.0                                                      | 1.0                                         | 1.0                                            | 1.0                                                    |
| <b>Sex</b>                                     |                                       |                                          |                                                          |                                             |                                                |                                                        |
| Men                                            | 0.8 (0.53-1.25)                       | 1.1 (0.69-1.68)                          | 1.1 (0.73-1.68)                                          | 1.0 (0.63-1.67)                             | 1.4 (0.92-2.02)                                | 0.8 (0.48-1.31)                                        |
| Women+                                         | 1.0                                   | 1.0                                      | 1.0                                                      | 1.0                                         | 1.0                                            | 1.0                                                    |
| <b>Race/Ethnicity</b>                          |                                       |                                          |                                                          |                                             |                                                |                                                        |
| NH White+                                      | 1.0                                   | 1.0                                      | 1.0                                                      | 1.0                                         | 1.0                                            | 1.0                                                    |
| NH Black                                       | 1.5 (0.78-2.82)                       | 1.0 (0.36-2.59)                          | 2.2 (0.80-6.23)                                          | 2.3 (0.81-6.68)                             | 1.5 (0.49-4.65)                                | 0.6 (0.21-1.91)                                        |
| Hispanic                                       | 0.7 (0.38-1.45)                       | 1.3 (0.64-2.56)                          | 0.9 (0.51-1.61)                                          | 0.7 (0.39-1.30)                             | 1.2 (0.63-2.41)                                | 1.0 (0.48-2.25)                                        |
| NH other                                       | 0.9 (0.41-1.87)                       | 1.2 (0.54-2.70)                          | 1.2 (0.53-2.57)                                          | 1.0 (0.38-2.48)                             | 1.3 (0.63-2.87)                                | 0.9 (0.38-2.12)                                        |
| <b>Family Income</b>                           |                                       |                                          |                                                          |                                             |                                                |                                                        |
| <\$20,000                                      | 1.1 (0.58-1.88)                       | <b>1.9 (1.14-3.27)</b>                   | 1.0 (0.50-1.83)                                          | 0.5 (0.24-1.01)                             | 0.9 (0.50-1.65)                                | <b>2.1 (1.12-4.04)</b>                                 |
| \$20,000-\$49,999                              | 1.1 (0.62-1.82)                       | 1.3 (0.77-2.29)                          | 0.8 (0.46-1.48)                                          | 0.6 (0.34-1.15)                             | 0.8 (0.44-1.37)                                | 1.7 (0.90-3.24)                                        |
| \$50,000-\$74,999                              | 2.0 (0.91-4.28)                       | 1.2 (0.62-2.36)                          | 1.0 (0.51-1.83)                                          | 0.8 (0.38-1.69)                             | <b>0.5 (0.24-0.99)</b>                         | <b>2.5 (1.13-5.30)</b>                                 |
| ≥\$75,000+                                     | 1.0                                   | 1.0                                      | 1.0                                                      | 1.0                                         | 1.0                                            | 1.0                                                    |
| <b>Metropolitan Statistical Area</b>           |                                       |                                          |                                                          |                                             |                                                |                                                        |
| Large metro+                                   | 1.0                                   | 1.0                                      | 1.0                                                      | 1.0                                         | 1.0                                            | 1.0                                                    |
| Small metro                                    | 1.5 (0.98-2.22)                       | 1.4 (0.86-2.12)                          | 1.0 (0.59-1.53)                                          | 0.7 (0.37-1.32)                             | 0.7 (0.42-1.00)                                | <b>2.1 (1.15-3.81)</b>                                 |
| Non-metro                                      | <b>1.8 (1.04-2.99)</b>                | 1.4 (0.85-2.37)                          | 1.0 (0.60-1.51)                                          | 0.7 (0.40-1.13)                             | <b>0.5 (0.31-0.94)</b>                         | <b>2.6 (1.52-4.59)</b>                                 |
| <b>Suicide Plan</b>                            |                                       |                                          |                                                          |                                             |                                                |                                                        |
| Yes                                            | 0.5 (0.23-1.14)                       | <b>4.1 (1.69-9.83)</b>                   | <b>2.5 (1.06-5.76)</b>                                   | 0.6 (0.25-1.46)                             | <b>4.8 (2.45-9.39)</b>                         | 0.9 (0.36-2.03)                                        |
| No+                                            | 1.0                                   | 1.0                                      | 1.0                                                      | 1.0                                         | 1.0                                            | 1.0                                                    |
| <b>Tobacco Use &amp; Disorder</b>              |                                       |                                          |                                                          |                                             |                                                |                                                        |
| PM nicotine dependence (ND)                    | 1.2 (0.63-2.44)                       | 1.4 (0.75-2.61)                          | <b>3.0 (1.47-6.28)</b>                                   | 2.2 (0.99-4.67)                             | <b>2.5 (1.32-4.57)</b>                         | 0.6 (0.27-1.22)                                        |
| PY tobacco use, no PM ND                       | 0.9 (0.46-1.79)                       | 1.0 (0.56-1.95)                          | 1.8 (0.92-3.52)                                          | 1.7 (0.83-3.62)                             | <b>2.0 (1.06-3.70)</b>                         | 0.5 (0.24-1.16)                                        |
| No PY tobacco use+                             | 1.0                                   | 1.0                                      | 1.0                                                      | 1.0                                         | 1.0                                            | 1.0                                                    |
| <b>Alcohol Use &amp; Disorder</b>              |                                       |                                          |                                                          |                                             |                                                |                                                        |
| PY alcohol use disorder                        | 1.6 (0.94-2.75)                       | <b>1.8 (1.02-3.22)</b>                   | 1.0 (0.59-1.73)                                          | 0.6 (0.29-1.07)                             | 0.6 (0.34-1.15)                                | <b>2.9 (1.61-5.16)</b>                                 |
| PY alcohol use, no disorder                    | 1.5 (0.97-2.33)                       | <b>1.7 (1.06-2.85)</b>                   | 1.2 (0.76-1.74)                                          | 0.7 (0.38-1.14)                             | 0.8 (0.49-1.19)                                | <b>2.3 (1.25-4.12)</b>                                 |
| No PY alcohol use +                            | 1.0                                   | 1.0                                      | 1.0                                                      | 1.0                                         | 1.0                                            | 1.0                                                    |

| Among Adults with Past-Year Buprenorphine Use | <b>ODU:</b><br>Misuse vs. No misuse | <b>No OUD:</b><br>Misuse vs. No misuse | Misuse & OUD vs. No Misuse & No OUD | <b>Misuse:</b><br>OUD vs. No OUD | <b>No Misuse:</b><br>OUD vs. No OUD | Misuse, No OUD vs. No Misuse, OUD |
|-----------------------------------------------|-------------------------------------|----------------------------------------|-------------------------------------|----------------------------------|-------------------------------------|-----------------------------------|
| <b>Cannabis Use &amp; Disorder</b>            |                                     |                                        |                                     |                                  |                                     |                                   |
| PY cannabis use disorder                      | 1.4 (0.65-3.05)                     | 0.8 (0.38-1.49)                        | 1.9 (0.97-3.56)                     | <b>2.5 (1.18-5.19)</b>           | 1.3 (0.66-2.63)                     | 0.6 (0.26-1.26)                   |
| PY cannabis use, but no disorder              | 1.2 (0.78-1.90)                     | <b>1.5 (1.02-2.24)</b>                 | <b>1.6 (1.05-2.55)</b>              | 1.1 (0.65-1.82)                  | 1.4 (0.86-2.10)                     | 1.1 (0.64-1.95)                   |
| No PY cannabis use+                           | 1.0                                 | 1.0                                    | 1.0                                 | 1.0                              | 1.0                                 | 1.0                               |
| <b>Cocaine Use &amp; Disorder</b>             |                                     |                                        |                                     |                                  |                                     |                                   |
| PY use or disorder                            | <b>2.3 (1.09-4.71)</b>              | <b>4.0 (2.35-6.92)</b>                 | <b>9.8 (4.81-20.10)</b>             | <b>2.4 (1.30-4.59)</b>           | <b>4.3 (1.81-10.38)</b>             | 0.9 (0.41-2.10)                   |
| Lifetime use, no PY use                       | <b>1.9 (1.02-3.59)</b>              | <b>2.1 (1.37-3.28)</b>                 | <b>3.7 (2.14-6.45)</b>              | <b>1.8 (1.03-3.00)</b>           | 1.9 (0.97-3.89)                     | 1.1 (0.51-2.36)                   |
| Never use+                                    | 1.0                                 | 1.0                                    | 1.0                                 | 1.0                              | 1.0                                 | 1.0                               |
| <b>Rx Sed./Tranq. Misuse &amp; Disorder</b>   |                                     |                                        |                                     |                                  |                                     |                                   |
| PY misuse & disorder                          | 0.9 (0.46-1.66)                     | 0.9 (0.57-1.50)                        | <b>1.7 (1.09-2.72)</b>              | <b>1.9 (1.13-3.03)</b>           | 2.0 (1.00-3.87)                     | 0.5 (0.22-1.03)                   |
| PY use, no misuse                             | <b>0.3 (0.16-0.64)</b>              | <b>0.3 (0.19-0.47)</b>                 | <b>0.4 (0.23-0.71)</b>              | 1.4 (0.83-2.22)                  | 1.3 (0.62-2.63)                     | <b>0.2 (0.11-0.49)</b>            |
| Lifetime use, no PY use                       | 0.6 (0.25-1.34)                     | 0.7 (0.34-1.45)                        | 0.5 (0.28-1.00)                     | 0.8 (0.35-1.61)                  | 0.9 (0.45-1.86)                     | 0.8 (0.29-2.01)                   |
| Never use+                                    | 1.0                                 | 1.0                                    | 1.0                                 | 1.0                              | 1.0                                 | 1.0                               |
| <b>Rx. Stimulant Misuse &amp; Disorder</b>    |                                     |                                        |                                     |                                  |                                     |                                   |
| PY use disorder                               | <b>3.9 (1.34-11.23)</b>             | 3.3 (0.91-12.35)                       | <b>4.0 (1.37-11.60)</b>             | 1.2 (0.43-3.27)                  | 1.0 (0.26-4.04)                     | 3.3 (0.78-13.62)                  |
| PY misuse, no disorder                        | 1.6 (1.00-2.62)                     | 1.2 (0.68-2.16)                        | 0.7 (0.36-1.38)                     | 0.6 (0.32-1.04)                  | <b>0.4 (0.21-0.88)</b>              | <b>2.8 (1.62-4.81)</b>            |
| No PY misuse +                                | 1.0                                 | 1.0                                    | 1.0                                 | 1.0                              | 1.0                                 | 1.0                               |
| <b>PY Hydrocodone Product Misuse</b>          |                                     |                                        |                                     |                                  |                                     |                                   |
| Yes                                           | 0.8 (0.51-1.30)                     | <b>4.3 (2.65-7.08)</b>                 | <b>4.9 (2.97-8.16)</b>              | 1.1 (0.74-1.75)                  | <b>6.9 (3.10-11.73)</b>             | 0.7 (0.39-1.32)                   |
| No+                                           | 1.0                                 | 1.0                                    | 1.0                                 | 1.0                              | 1.0                                 | 1.0                               |
| <b>PY Oxycodone Product Misuse</b>            |                                     |                                        |                                     |                                  |                                     |                                   |
| Yes                                           | <b>1.9 (1.18-3.05)</b>              | <b>3.9 (2.31-6.46)</b>                 | <b>10.0 (5.77-16.23)</b>            | <b>2.5 (1.49-4.21)</b>           | <b>5.1 (2.80-9.29)</b>              | 0.8 (0.38-1.50)                   |
| No+                                           | 1.0                                 | 1.0                                    | 1.0                                 | 1.0                              | 1.0                                 | 1.0                               |
| <b>PY Substance Use Treatment</b>             |                                     |                                        |                                     |                                  |                                     |                                   |
| Drug only                                     | <b>0.4 (0.27-0.67)</b>              | <b>0.4 (0.21-0.58)</b>                 | <b>1.7 (1.05-2.82)</b>              | <b>4.9 (2.79-8.67)</b>           | <b>4.0 (2.60-6.17)</b>              | <b>0.1 (0.05-0.15)</b>            |
| Both alcohol and drug                         | 1.0 (0.56-1.90)                     | 0.7 (0.31-1.64)                        | <b>2.6 (1.40-4.82)</b>              | <b>3.6 (1.84-7.10)</b>           | <b>2.5 (1.17-5.43)</b>              | <b>0.3 (0.14-0.58)</b>            |
| None+                                         | 1.0                                 | 1.0                                    | 1.0                                 | 1.0                              | 1.0                                 | 1.0                               |

Data source: 2469 respondents of 2015-2019 National Surveys on Drug Use and Health data. Misuse=buprenorphine misuse; OUD=opioid use disorder; PY=past year; PM=past month; Rx=prescription; Sed./Tranq=sedative or tranquilizer; Each **bolded** estimate is statistically significantly ( $P<0.05$ ) different from the estimate of the reference group (with + sign). Other variables, which were presented in Table 2, but not in Table 3, were not significantly associated with the outcomes and were removed from this final multinomial logistic regression model. Age, sex, and race/ethnicity remained in the final model regardless of their statistical significance.
